# Supplementary material for: Lysine 68 acetylation directs MnSOD as a tetrameric detoxification complex versus a monomeric tumor promoter
Source: PubMed Central journal article supplement (PMC6546705; doi:10.1038/s41467-019-10352-4), 2019-06-03
Supplement: 41467_2019_10352_MOESM3_ESM.pdf [file 41467_2019_10352_MOESM3_ESM.pdf]

## Reporting Summary

Nature Research wishes to improve the reproducibility of the work that we publish. This form provides structure for consistency and transparency in reporting. For further information on Nature Research policies, see [Authors & Referees](#) and the [Editorial Policy Checklist](#).

### Statistics

For all statistical analyses, confirm that the following items are present in the figure legend, table legend, main text, or Methods section.

n/a Confirmed

- |                                     |                                     |                                                                                                                                                                                                                                                            |
|-------------------------------------|-------------------------------------|------------------------------------------------------------------------------------------------------------------------------------------------------------------------------------------------------------------------------------------------------------|
| <input type="checkbox"/>            | <input checked="" type="checkbox"/> | The exact sample size ( $n$ ) for each experimental group/condition, given as a discrete number and unit of measurement                                                                                                                                    |
| <input type="checkbox"/>            | <input checked="" type="checkbox"/> | A statement on whether measurements were taken from distinct samples or whether the same sample was measured repeatedly                                                                                                                                    |
| <input type="checkbox"/>            | <input checked="" type="checkbox"/> | The statistical test(s) used AND whether they are one- or two-sided<br><i>Only common tests should be described solely by name; describe more complex techniques in the Methods section.</i>                                                               |
| <input checked="" type="checkbox"/> | <input type="checkbox"/>            | A description of all covariates tested                                                                                                                                                                                                                     |
| <input checked="" type="checkbox"/> | <input type="checkbox"/>            | A description of any assumptions or corrections, such as tests of normality and adjustment for multiple comparisons                                                                                                                                        |
| <input type="checkbox"/>            | <input checked="" type="checkbox"/> | A full description of the statistical parameters including central tendency (e.g. means) or other basic estimates (e.g. regression coefficient) AND variation (e.g. standard deviation) or associated estimates of uncertainty (e.g. confidence intervals) |
| <input checked="" type="checkbox"/> | <input type="checkbox"/>            | For null hypothesis testing, the test statistic (e.g. $F$ , $t$ , $r$ ) with confidence intervals, effect sizes, degrees of freedom and $P$ value noted<br><i>Give <math>P</math> values as exact values whenever suitable.</i>                            |
| <input checked="" type="checkbox"/> | <input type="checkbox"/>            | For Bayesian analysis, information on the choice of priors and Markov chain Monte Carlo settings                                                                                                                                                           |
| <input checked="" type="checkbox"/> | <input type="checkbox"/>            | For hierarchical and complex designs, identification of the appropriate level for tests and full reporting of outcomes                                                                                                                                     |
| <input checked="" type="checkbox"/> | <input type="checkbox"/>            | Estimates of effect sizes (e.g. Cohen's $d$ , Pearson's $r$ ), indicating how they were calculated                                                                                                                                                         |

*Our web collection on [statistics for biologists](#) contains articles on many of the points above.*

### Software and code

Policy information about [availability of computer code](#)

Data collection

N/A

Data analysis

N/A

For manuscripts utilizing custom algorithms or software that are central to the research but not yet described in published literature, software must be made available to editors/reviewers. We strongly encourage code deposition in a community repository (e.g. GitHub). See the Nature Research [guidelines for submitting code & software](#) for further information.

### Data

Policy information about [availability of data](#)

All manuscripts must include a [data availability statement](#). This statement should provide the following information, where applicable:

- Accession codes, unique identifiers, or web links for publicly available datasets
- A list of figures that have associated raw data
- A description of any restrictions on data availability

This paragraph is located on page 32 of the manuscript.

The authors declare that all of the data supporting our findings of this study are available within the paper as well as the Supplementary Information file. In addition, all of the data that support the findings of this study are available on request from the corresponding author (DG). The MnSOD structure data has been deposited in the protein data bank (ID: 1PL4; DOI: 10.2210/pdb1PL4/pdb) (ref. PubMed: 14638684; DOI: 10.1074/jbc.M311310200).

## Field-specific reporting

Please select the one below that is the best fit for your research. If you are not sure, read the appropriate sections before making your selection.

- Life sciences     Behavioural & social sciences     Ecological, evolutionary & environmental sciences

For a reference copy of the document with all sections, see [nature.com/documents/nr-reporting-summary-flat.pdf](https://www.nature.com/documents/nr-reporting-summary-flat.pdf)

## Life sciences study design

All studies must disclose on these points even when the disclosure is negative.

|                 |                                                                                                                                                                                                                                          |
|-----------------|------------------------------------------------------------------------------------------------------------------------------------------------------------------------------------------------------------------------------------------|
| Sample size     | Sample size for all mouse experiments were 10 mice per group that was chosen to address the concerns of reviewer number 3, who specifically asked for 10 mice per experimental group.                                                    |
| Data exclusions | No data were excluded from any analysis.                                                                                                                                                                                                 |
| Replication     | All experiments were done in triplicate, and text stating this is present in the figure legends.                                                                                                                                         |
| Randomization   | Not relevant to our study. There were no randomization experiments done in this manuscript.                                                                                                                                              |
| Blinding        | No blinded studies were necessary because we used a computer program to analyze the tissue microarray data, as shown in Figure 8. This text is in Figure legend 8: "The intensity of staining was quantified using HistoQuest software." |

## Reporting for specific materials, systems and methods

We require information from authors about some types of materials, experimental systems and methods used in many studies. Here, indicate whether each material, system or method listed is relevant to your study. If you are not sure if a list item applies to your research, read the appropriate section before selecting a response.

### Materials & experimental systems

| n/a                                 | Involved in the study                                           |
|-------------------------------------|-----------------------------------------------------------------|
| <input type="checkbox"/>            | <input checked="" type="checkbox"/> Antibodies                  |
| <input type="checkbox"/>            | <input checked="" type="checkbox"/> Eukaryotic cell lines       |
| <input checked="" type="checkbox"/> | <input type="checkbox"/> Palaeontology                          |
| <input type="checkbox"/>            | <input checked="" type="checkbox"/> Animals and other organisms |
| <input checked="" type="checkbox"/> | <input type="checkbox"/> Human research participants            |
| <input checked="" type="checkbox"/> | <input type="checkbox"/> Clinical data                          |

### Methods

| n/a                                 | Involved in the study                           |
|-------------------------------------|-------------------------------------------------|
| <input checked="" type="checkbox"/> | <input type="checkbox"/> ChIP-seq               |
| <input checked="" type="checkbox"/> | <input type="checkbox"/> Flow cytometry         |
| <input checked="" type="checkbox"/> | <input type="checkbox"/> MRI-based neuroimaging |

## Antibodies

### Antibodies used

Anti-Ki67: eBioscience  
Cat#: 14-5698-82  
Anti-MnSOD: Cell Signaling  
Cat#: D3X8F  
Anti-SIRT3: Cell Signaling  
Cat#: D22A3  
Anti-Actin: Cell Signaling  
Cat#: 4970  
Anti-IDH2: Cell Signaling  
Cat#: 56439  
Anti-OSCP: Santa Cruz Biotechnology  
Cat#: sc-365162  
Anti-Rabbit Secondary: Cell Signaling  
Cat#: 7074  
Mouse Secondary: Cell Signaling  
Cat#: 7076  
Anti-MnSOD K68-Ac: Ab-Cam  
Cat#: Ab137037  
Anti-MnSOD K122-Ac: Epitomics, Inc, Burlingame, CA, This company has been bought by Abcam, Inc.  
Anti-OSCP K139-Ac: Epitomics, Inc, Burlingame, CA, This company has been bought by Abcam, Inc.  
Anti-IDH2 K413-Ac: Epitomics, Inc, Burlingame, CA, This company has been bought by Abcam, Inc.

### Validation

For all the commercially available antibodies, see the manufacturers' websites, which provides references and validations for their antibodies.

For anti-MnSOD-K68-Ac antibody text is provided in the figure legend of supplemental Figure s4, stating "A Flag-tagged MnSOD vector was transfected into HEK 293T cells with TSA (1  $\mu$ M) and after 48 h Flag-MnSOD was IPed and samples were washed and incubated with purified SIRT3 protein without (lane 1) or with (lane 2) NAD (left panel). After 2 h mixtures were immunoblotted with an anti-MnSOD-K68-Ac antibody (Abcam, Inc). Identical experiments were done with the control non-acetylated peptide (middle panel) or the 13 amino acid K68-Ac peptide (right panel). Livers were harvested from isogenic, 2-month-old age-matched mice that were placed on an ad libitum (AL) or caloric restriction (CR) diet for 12 weeks. Mitochondrial extracts were isolated, separated, and subsequently blotted with antibodies to MnSOD, MnSOD-K68-Ac, SIRT3, and COXIV."

For validation of the other anti-acetylated antibodies, text for sources of validation is provided in the figure legend of supplemental Figure s5, stating "The cell lysates were analyzed by immunoblotting with anti-MnSOD-K122-Ac (validated as a SIRT3 deacetylation target in Tao et al., 2010, Cancer Cell), anti-MnSOD, anti-OSCP-K139-Ac (validated as a SIRT3 deacetylation target in Tao et al., 2010, Cancer Cell), anti-OSCP, anti-IDH2K413-Ac (validated as a SIRT3 deacetylation target in Someya et al., 2010, Cancer Cell), anti-IDH2, and anti-actin."

## Eukaryotic cell lines

Policy information about [cell lines](#)

|                                                                   |                                                                                                                                                                                                                                                                                                                                           |
|-------------------------------------------------------------------|-------------------------------------------------------------------------------------------------------------------------------------------------------------------------------------------------------------------------------------------------------------------------------------------------------------------------------------------|
| Cell line source(s)                                               | ATCC                                                                                                                                                                                                                                                                                                                                      |
| Authentication                                                    | HEK-293T, MCF7, T47D and NIH3T3 cells were obtained from ATCC in 2012, authenticated using STR profiling with CellCheck 9 Plus by IDEXX Bioresearch, and tested for mycoplasma using Plasmotest™ - Mycoplasma Detection Kit (InvivoGen, Inc). Early passages of cells were frozen, and all cells were passaged for fewer than six months. |
| Mycoplasma contamination                                          | All cell lines were tested for mycoplasma using Plasmotest™ - Mycoplasma Detection Kit (InvivoGen, Inc).                                                                                                                                                                                                                                  |
| Commonly misidentified lines (See <a href="#">ICLAC</a> register) | None                                                                                                                                                                                                                                                                                                                                      |

## Animals and other organisms

Policy information about [studies involving animals](#); [ARRIVE guidelines](#) recommended for reporting animal research

|                         |                                                                                                    |
|-------------------------|----------------------------------------------------------------------------------------------------|
| Laboratory animals      | Species:<br>- mice, athymic nude, nu/nu, female, 6-7 weeks, purchased from The Jackson Laboratory. |
| Wild animals            | None                                                                                               |
| Field-collected samples | None                                                                                               |
| Ethics oversight        | Northwestern University Institutional Animal Care and Use Committee (IACUC)                        |

Note that full information on the approval of the study protocol must also be provided in the manuscript.
